# Supplementary material
Source: MDPI journal article supplement (https://www.mdpi.com/1661-3821/3/2/15)
Supplement: s1 [file s1]

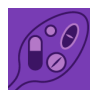

# Potential of raspberry flower petals as a rich source of bioactive flavan-3-ol derivatives revealed by polyphenolic profiling

**Supplementary data 1.** Statistical processing data for the analysis results shown in Figure 2

**Table S1.** Statistical results comparing fractions of each flower and petals (PE) in each analysis result in Figure 2.

|                        | Part | Mean ± SD    | p Value <sup>1</sup> (vs. PE) |                      |
|------------------------|------|--------------|-------------------------------|----------------------|
|                        |      |              | Student's <i>t</i> test       | ANOVA                |
| Total polyphenol       | RE   | 2.6 ± 0.10   | *** <i>p</i> < 0.001          | *** <i>p</i> < 0.001 |
|                        | SE   | 1.8 ± 0.20   | *** <i>p</i> < 0.001          | *** <i>p</i> < 0.001 |
|                        | PI   | 1.7 ± 0.13   | *** <i>p</i> < 0.001          | *** <i>p</i> < 0.001 |
|                        | ST   | 6.7 ± 0.62   | *** <i>p</i> < 0.001          | *** <i>p</i> < 0.001 |
|                        | PE   | 3.7 ± 0.26   |                               |                      |
| Total proanthocyanidin | RE   | 0.90 ± 0.23  | *** <i>p</i> < 0.001          | *** <i>p</i> < 0.001 |
|                        | SE   | 0.17 ± 0.029 | *** <i>p</i> < 0.001          | *** <i>p</i> < 0.001 |
|                        | PI   | 0.49 ± 0.074 | *** <i>p</i> < 0.001          | *** <i>p</i> < 0.001 |
|                        | ST   | 3.4 ± 0.17   | *** <i>p</i> < 0.001          | *** <i>p</i> < 0.001 |
|                        | PE   | 2.2 ± 0.057  |                               |                      |
| Quantity of VC         | RE   | 62.6 ± 7.3   | *** <i>p</i> < 0.001          | *** <i>p</i> < 0.001 |
|                        | SE   | 60.6 ± 3.7   | *** <i>p</i> < 0.001          | *** <i>p</i> < 0.001 |
|                        | PI   | 75.4 ± 6.1   | *** <i>p</i> < 0.001          | *** <i>p</i> < 0.001 |
|                        | ST   | 84.5 ± 5.2   | *** <i>p</i> < 0.001          | *** <i>p</i> < 0.001 |
|                        | PE   | 95.6 ± 2.6   |                               |                      |
| Total glucose          | RE   | 25.5 ± 0.71  | *** <i>p</i> < 0.001          | *** <i>p</i> < 0.001 |
|                        | SE   | 25.7 ± 0.30  | *** <i>p</i> < 0.001          | *** <i>p</i> < 0.001 |
|                        | PI   | 25.9 ± 0.94  | *** <i>p</i> < 0.001          | *** <i>p</i> < 0.001 |
|                        | ST   | 29.0 ± 0.60  | *** <i>p</i> < 0.001          | *** <i>p</i> < 0.001 |
|                        | PE   | 56.0 ± 2.5   |                               |                      |

<sup>1</sup> *p* Value: \*\*\**p* < 0.001.

**Supplementary data 2.** Statistical results of data obtained from Figure 5 and Table 2

**Table S2.** Statistical results comparing fractions of each flower and petals (PE) for the amounts of compounds shown in Figure 5 and Table 2.

|                     | Part | Mean ± SD      | p Value <sup>1</sup> (vs. PE) |                      |
|---------------------|------|----------------|-------------------------------|----------------------|
|                     |      |                | Student's <i>t</i> test       | ANOVA                |
| (+)–Catechin (1)    | RE   | 0.13 ± 0.0042  | *** <i>p</i> < 0.001          | *** <i>p</i> < 0.001 |
|                     | SE   | 0.13 ± 0.0035  | *** <i>p</i> < 0.001          | *** <i>p</i> < 0.001 |
|                     | PI   | 0.22 ± 0.0064  | *** <i>p</i> < 0.001          | *** <i>p</i> < 0.001 |
|                     | ST   | 0.14 ± 0.0057  | *** <i>p</i> < 0.001          | *** <i>p</i> < 0.001 |
|                     | PE   | 0.83 ± 0.010   |                               |                      |
| (–)–Epicatechin (2) | RE   | 0.064 ± 0.014  | *** <i>p</i> < 0.001          | *** <i>p</i> < 0.001 |
|                     | SE   | 0.079 ± 0.0066 | *** <i>p</i> < 0.001          | *** <i>p</i> < 0.001 |
|                     | PI   | 0.056 ± 0.010  | *** <i>p</i> < 0.001          | *** <i>p</i> < 0.001 |
|                     | ST   | 0.15 ± 0.011   | 0.0072 *                      | 0.0070 *             |
|                     | PE   |                |                               |                      |

|                         |    |                                |                      |                      |
|-------------------------|----|--------------------------------|----------------------|----------------------|
|                         | PE | 0.19 ± 0.033                   |                      |                      |
|                         | RE | 0.44 ± 0.30                    | N.S. <sup>2</sup>    | N.S. <sup>2</sup>    |
|                         | SE | 0.25 ± 0.018                   | *** <i>p</i> < 0.001 | *** <i>p</i> < 0.001 |
| Procyanidin B4 (3)      | PI | 0.29 ± 0.031                   | *** <i>p</i> < 0.001 | *** <i>p</i> < 0.001 |
|                         | ST | 0.42 ± 0.022                   | N.S. <sup>2</sup>    | N.S. <sup>2</sup>    |
|                         | PE | 0.40 ± 0.032                   |                      |                      |
|                         | RE | 0.19 ± 0.0038                  | *** <i>p</i> < 0.001 | *** <i>p</i> < 0.001 |
|                         | SE | 0.12 ± 0.0039                  | *** <i>p</i> < 0.001 | *** <i>p</i> < 0.001 |
| Procyanidin C3 (4)      | PI | 0.13 ± 0.0047                  | *** <i>p</i> < 0.001 | *** <i>p</i> < 0.001 |
|                         | ST | 0.11 ± 0.0068                  | *** <i>p</i> < 0.001 | *** <i>p</i> < 0.001 |
|                         | PE | 0.15 ± 0.0043                  |                      |                      |
|                         | RE | 0.022 ± 0.00036                | *** <i>p</i> < 0.001 | *** <i>p</i> < 0.001 |
|                         | SE | 0.025 ± 0.00045                | *** <i>p</i> < 0.001 | *** <i>p</i> < 0.001 |
| (-)-Epicatechin-3,5-di- | PI | 0.021 ± 0.00055                | *** <i>p</i> < 0.001 | *** <i>p</i> < 0.001 |
| O-gallate (7)           | ST | 0.026 ± 0.00044                | *** <i>p</i> < 0.001 | *** <i>p</i> < 0.001 |
|                         | PE | 0.079 ± 2.5 × 10 <sup>-7</sup> |                      |                      |

<sup>1</sup>*p* Value: \*\*\**p* < 0.001, \**p* < 0.01, <sup>2</sup>N.S.: non-significant.

### Supplementary data 3. Statistical results of data obtained from Figure 6

**Table S3.** Statistical results comparing fractions of each flower and petals (PE) in the bioactivity test results shown in Figure 6.

|                        | Part | Mean ± SD    | <i>p</i> Value <sup>1</sup> (vs. PE) |                      |
|------------------------|------|--------------|--------------------------------------|----------------------|
|                        |      |              | Student's <i>t</i> test              | ANOVA                |
|                        | RE   | 43.2 ± 0.72  | N.S.                                 | N.S.                 |
| DPPH Radical           | SE   | 31.4 ± 0.83  | *** <i>p</i> < 0.001                 | *** <i>p</i> < 0.001 |
| Scavenging Activity    | PI   | 35.0 ± 1.2   | *** <i>p</i> < 0.001                 | *** <i>p</i> < 0.001 |
|                        | ST   | 42.6 ± 0.35  | *** <i>p</i> < 0.001                 | *** <i>p</i> < 0.001 |
|                        | PE   | 44.1 ± 0.59  |                                      |                      |
|                        | RE   | 30.4 ± 1.6   | *** <i>p</i> < 0.001                 | *** <i>p</i> < 0.001 |
| ABTS Radical           | SE   | 13.6 ± 0.42  | *** <i>p</i> < 0.001                 | *** <i>p</i> < 0.001 |
| Scavenging Activity    | PI   | 21.4 ± 0.68  | *** <i>p</i> < 0.001                 | *** <i>p</i> < 0.001 |
|                        | ST   | 49.3 ± 0.75  | N.S. <sup>2</sup>                    | N.S. <sup>2</sup>    |
|                        | PE   | 49.7 ± 0.067 |                                      |                      |
|                        | RE   | 46.5 ± 0.80  | N.S. <sup>2</sup>                    | N.S. <sup>2</sup>    |
|                        | SE   | 47.2 ± 0.58  | N.S. <sup>2</sup>                    | N.S. <sup>2</sup>    |
| Antioxidant Activity   | PI   | 45.5 ± 0.75  | 0.0017**                             | 0.0035**             |
|                        | ST   | 47.4 ± 0.25  | N.S. <sup>2</sup>                    | N.S. <sup>2</sup>    |
|                        | PE   | 46.9 ± 0.46  |                                      |                      |
|                        | RE   | 58.9 ± 3.1   | *** <i>p</i> < 0.001                 | *** <i>p</i> < 0.001 |
| Inhibitory Activity of | SE   | 40.5 ± 5.6   | *** <i>p</i> < 0.001                 | *** <i>p</i> < 0.001 |
| HeLa S3 cell           | PI   | 61.3 ± 5.0   | *** <i>p</i> < 0.001                 | *** <i>p</i> < 0.001 |
| proliferation          | ST   | 93.2 ± 1.6   | 0.0031 **                            | 0.0014 **            |
|                        | PE   | 96.0 ± 0.28  |                                      |                      |

<sup>1</sup>*p* Value: \*\*\**p* < 0.001, \*\**p* < 0.005, <sup>2</sup>N.S.: non-significant.
